# Supplementary material
Source: PubMed Central journal article supplement (PMC7075882)

## CPRS Anxiety

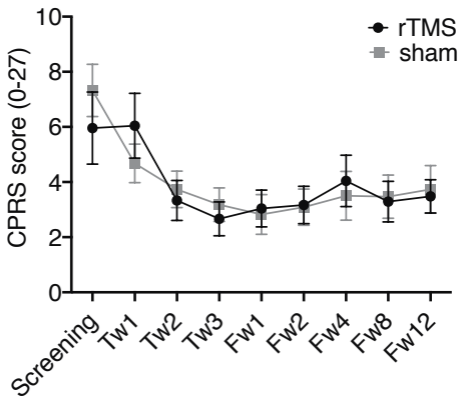

## CPRS Depression

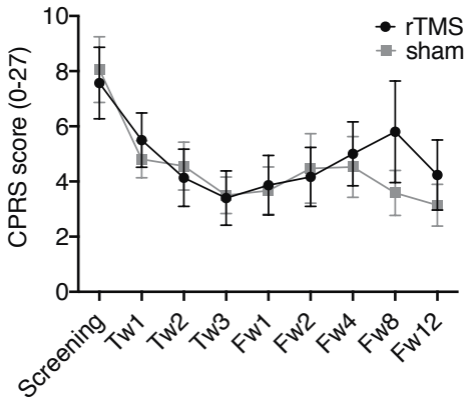

Supplement: 41386_2019_565_MOESM2_ESM.pdf [file 41386_2019_565_MOESM2_ESM.pdf]

# REWARD

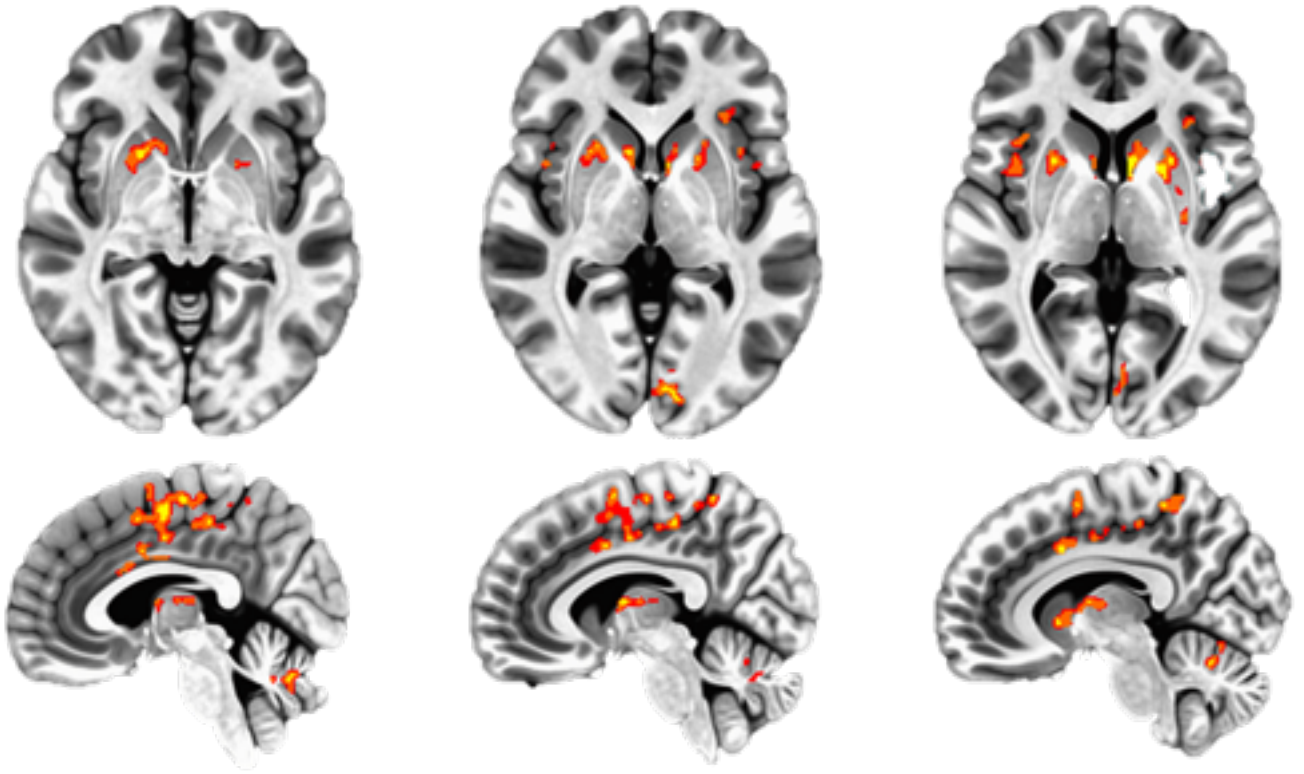

# PUNISHMENT

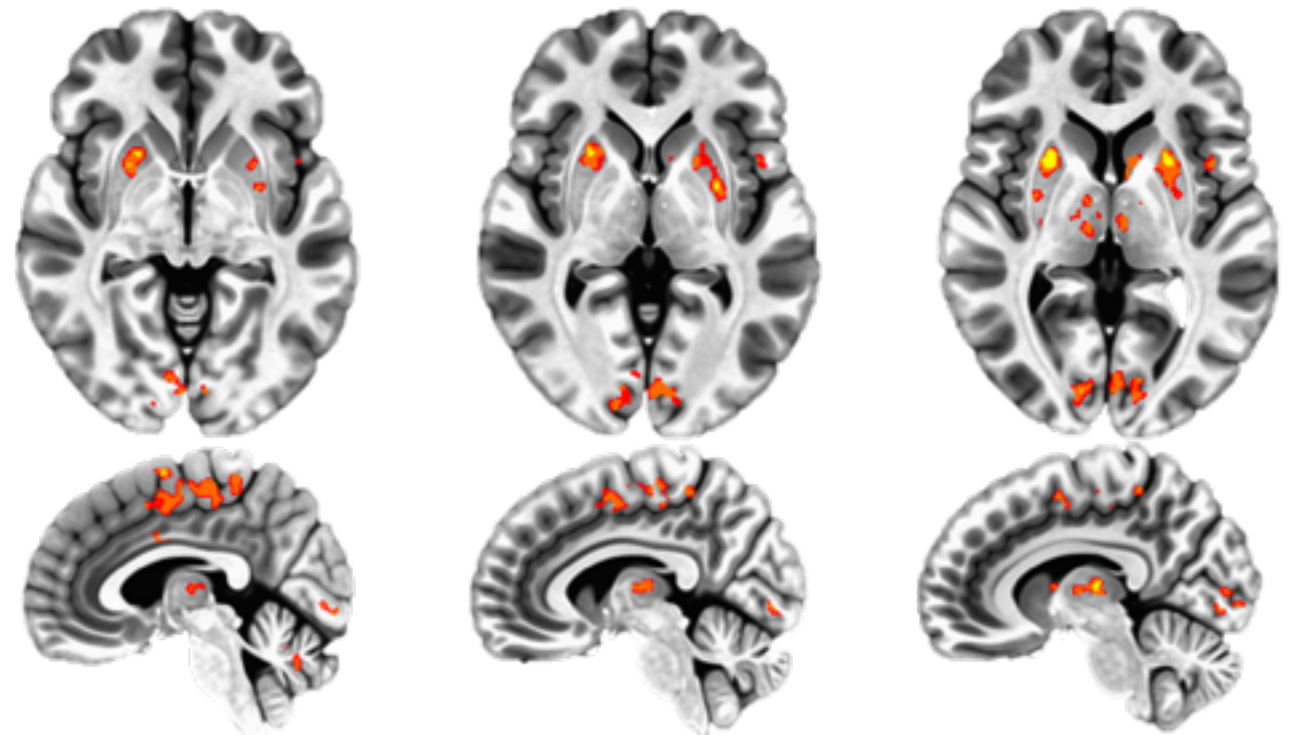

Supplement: 41386_2019_565_MOESM3_ESM.pdf [file 41386_2019_565_MOESM3_ESM.pdf]

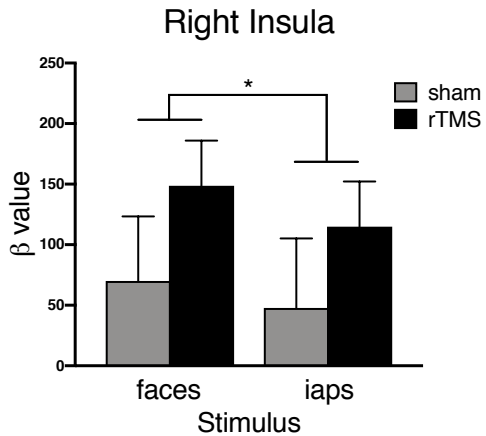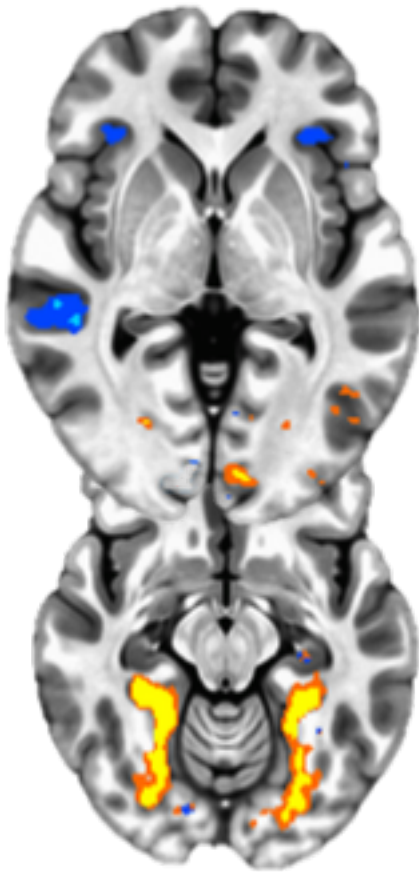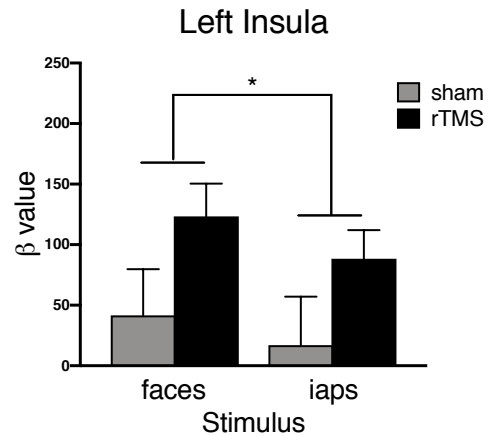

Supplement: 41386_2019_565_MOESM4_ESM.pdf [file 41386_2019_565_MOESM4_ESM.pdf]
